# Supplementary material for: Two-step naked-eye detection of lectin by hierarchical organization of soft nanotubes into liquid crystal and gel phases
Source: Royal Society of Chemistry journal article supplement (doi:10.1039/c5cc01464f), 2015-01-01
Supplement: c5cc01464f1.pdf [file c5cc01464f1.pdf]

## **Electronic Supplemental Information (ESI)**

### **Title**

Two-Step Naked-Eye Detection of a Lectin by Hierarchical Organization of Soft Nanotubes into Liquid Crystal and Gel Phases

### **Authors**

Naohiro Kameta,\* Mitsutoshi Masuda, and Toshimi Shimizu

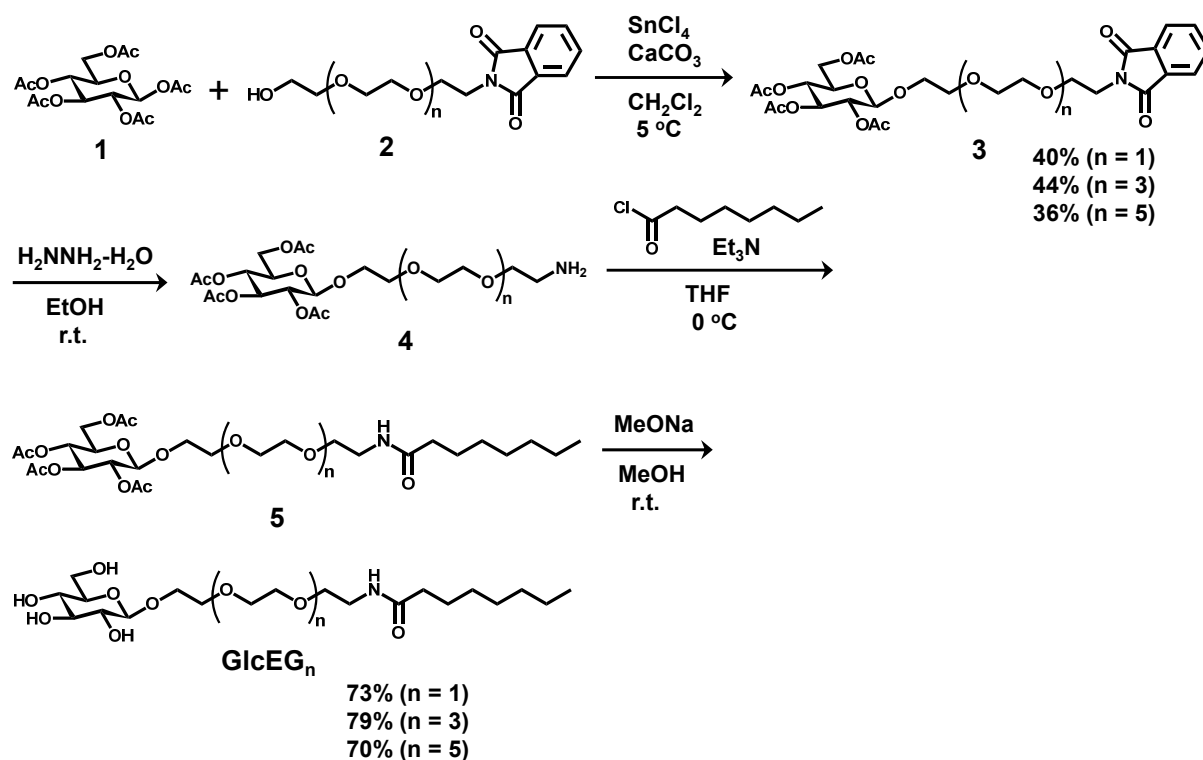

**Scheme S1** Synthesis of **GlcEG<sub>1</sub>**, **GlcEG<sub>2</sub>**, and **GlcEG<sub>3</sub>**.

The compound **2** was synthesized according to a following literature: D. Parker, *Macrocyclic Synthesis*, Oxford University, 1996.

The glycosylation was carried out according to a following literature: T. Murakami et al., *Carbohydrate Research* 2007, **342**, 1009.

**3 (n=3)**: <sup>1</sup>H-NMR (400 MHz, in CDCl<sub>3</sub>), 7.85 (2H, *m*, phthalimide), 7.23 (2H, *m*, phthalimide), 5.31 (1H, *t*, GlcH-1), 5.26 (1H, *t*, GlcH-3), 5.06 (1H, *t*, GlcH-4), 4.92 (1H, *t*, GlcH-2), 4.31 (1H, *dd*, GlcH-6a), 4.07 (1H, *dd*, GlcH-6b), 3.90 (2H, *t*, -CH<sub>2</sub>-), 3.84 (1H, *m*, Glc-H5), 3.75 (4H, *t*, -CH<sub>2</sub>-), 3.60-3.67 (12H, *m*, -(OCH<sub>2</sub>CH<sub>2</sub>O)<sub>3</sub>-), 3.26 (2H, *t*, -CH<sub>2</sub>-), 2.07 (3H, *s*, Glc-OAc), 2.04 (3H, *s*, Glc-OAc), 2.03 (3H, *s*, Glc-OAc), 2.02 (3H, *s*, Glc-OAc). ESI-MS (m/z): 698.27 [M + H]<sup>+</sup>.

**3 (n=1)**: <sup>1</sup>H-NMR (400 MHz, in CDCl<sub>3</sub>), 3.60-3.67 (4H, *m*, -OCH<sub>2</sub>CH<sub>2</sub>O-), the other data are similar to those of **3 (n=3)**. ESI-MS (m/z): 610.22 [M + H]<sup>+</sup>.

**3 (n=5)**: <sup>1</sup>H-NMR (400 MHz, in CDCl<sub>3</sub>), 3.60-3.67 (20H, *m*, -(OCH<sub>2</sub>CH<sub>2</sub>O)<sub>5</sub>-), the other data are similar to those of **3 (n=3)**. ESI-MS (m/z): 786.32 [M + H]<sup>+</sup>.

**GlcEG<sub>3</sub>**: <sup>1</sup>H-NMR (400 MHz, in DMSO-d<sub>6</sub>), 7.75 (1H, *br*, NH), 4.96 (1H, *d*, GlcOH-4), 4.87 (1H, *d*, GlcOH-3), 4.81 (1H, *t*, GlcOH-2), 4.69 (1H, *t*, GlcH-1), 4.47 (1H, *t*, GlcOH-6), 3.63 (1H, *m*, GlcH-6a), 3.4 (1H, *m*, GlcH-6b, and 16H, *m*, -CH<sub>2</sub>-(OCH<sub>2</sub>CH<sub>2</sub>O)<sub>3</sub>-CH<sub>2</sub>-), 3.1-2.9 (1H, GlcH-4; 3H, GlcH-2, -3, -5; 2H, Glc-O-CH<sub>2</sub>-; 2H, -CH<sub>2</sub>-NHCO-), 2.07 (2H, *m*, CO-CH<sub>2</sub>-), 1.47 (2H, *m*, CO-CH<sub>2</sub>-CH<sub>2</sub>-), 1.23 (8H, *m*, -CH<sub>2</sub>-), 0.85 (3H, *t*, -CH<sub>3</sub>). Anal. calcd for C<sub>24</sub>H<sub>47</sub>NO<sub>11</sub>: C 54.84, H 9.01, N 2.66. Found: C 54.75, H 9.09, N 2.58.

**GlcEG<sub>1</sub>**: <sup>1</sup>H-NMR (400 MHz, in DMSO-d<sub>6</sub>), 3.4 (1H, *m*, GlcH-6b, and 8H, *m*, -CH<sub>2</sub>-OCH<sub>2</sub>CH<sub>2</sub>O-CH<sub>2</sub>-), the other data are similar to those of **GlcEG<sub>3</sub>**. Anal. calcd for C<sub>20</sub>H<sub>39</sub>NO<sub>9</sub>: C 54.90, H 8.98, N 3.20. Found: C 54.80, H 9.08, N 3.10.

**GlcEG<sub>5</sub>**: <sup>1</sup>H-NMR (400 MHz, in DMSO-d<sub>6</sub>), 3.4 (1H, *m*, GlcH-6b, and 24H, *m*, -CH<sub>2</sub>-(OCH<sub>2</sub>CH<sub>2</sub>O)<sub>5</sub>-CH<sub>2</sub>-), the other data are similar to those of **GlcEG<sub>3</sub>**. Anal. calcd for C<sub>28</sub>H<sub>55</sub>NO<sub>13</sub>: C 54.80, H 9.03, N 2.28. Found: C 53.72, H 10.02, N 2.13.

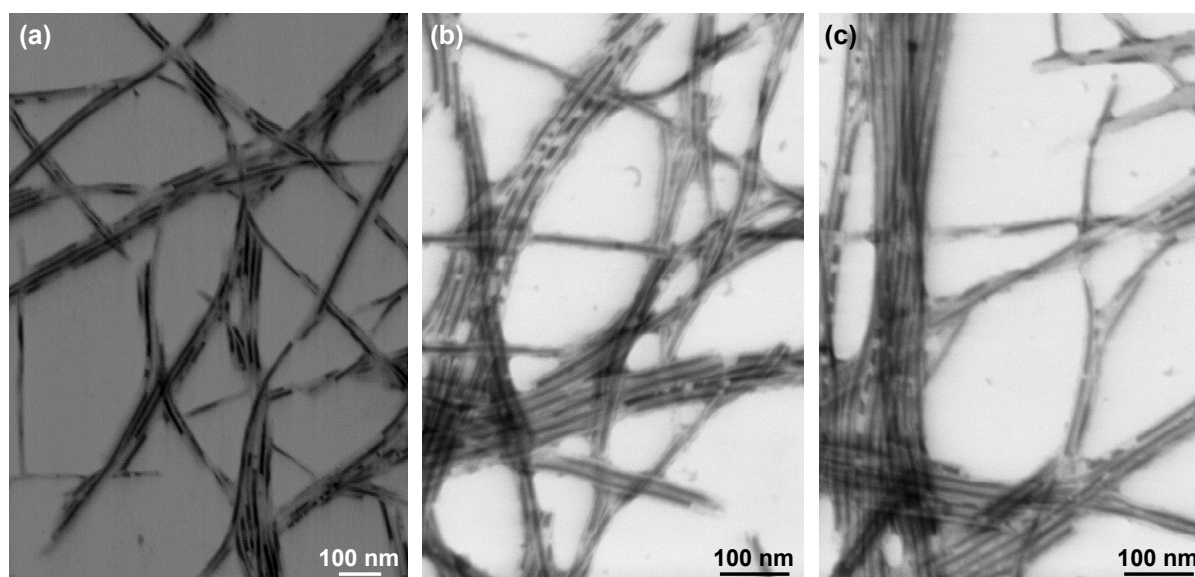

**Fig. S1** (a) TEM image of the 2-nanotubes obtained by binary self-assembly of **1** and TGly in water. (b) TEM image of the GlcEG<sub>1</sub>-nanotubes obtained by the heat treatment of the 2-nanotube with GlcEG<sub>1</sub>. (c) TEM image of the GlcEG<sub>5</sub>-nanotubes obtained by the heat treatment of the 2-nanotube with GlcEG<sub>5</sub>. The hollow cylindrical space of the nanotubes is visible with phosphotungstate as a negative staining reagent.

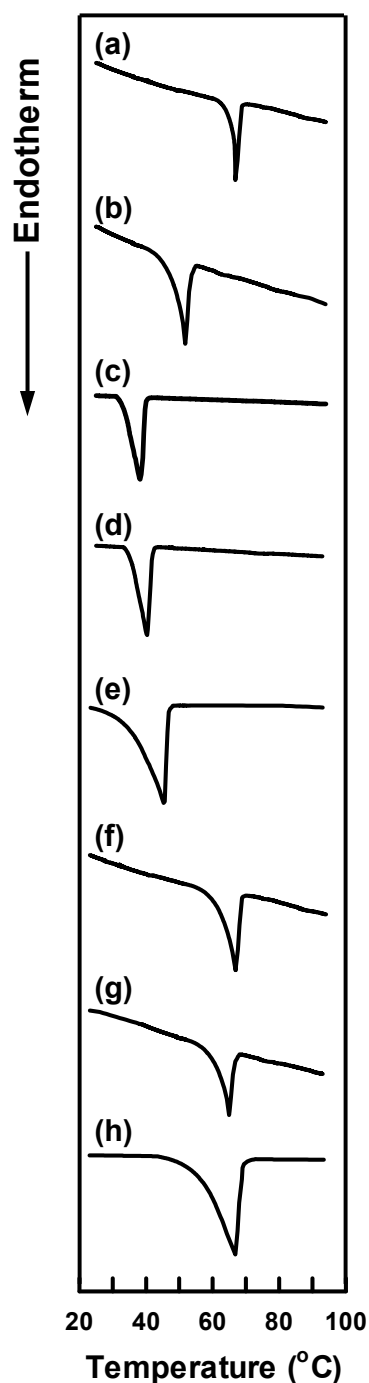

**Fig. S2** DSC profiles of the fully hydrated self-assembled structures. Each nanostructure (1 mg) in the presence of water (20 mL) was placed in an aluminum pan to facilitate DSC measurements. (a) 1-nanotube formed by self-assembly of **1**, (b) 2-nanotube formed by binary self-assembly of **1** and TGly, (c) helical nanofiber formed by self-assembly of GlcEG<sub>1</sub>, (d) helical nanofiber formed by self-assembly of GlcEG<sub>3</sub>, (e) helical nanofiber formed by self-assembly of GlcEG<sub>5</sub>, (f) GlcEG<sub>1</sub>-nanotube formed by the heat treatment of the 2-nanotube with GlcEG<sub>1</sub>, (g) GlcEG<sub>3</sub>-nanotube formed by the heat treatment of the 2-nanotube with GlcEG<sub>3</sub>, (h) GlcEG<sub>5</sub>-nanotube formed by the heat treatment of the 2-nanotube with GlcEG<sub>5</sub>.

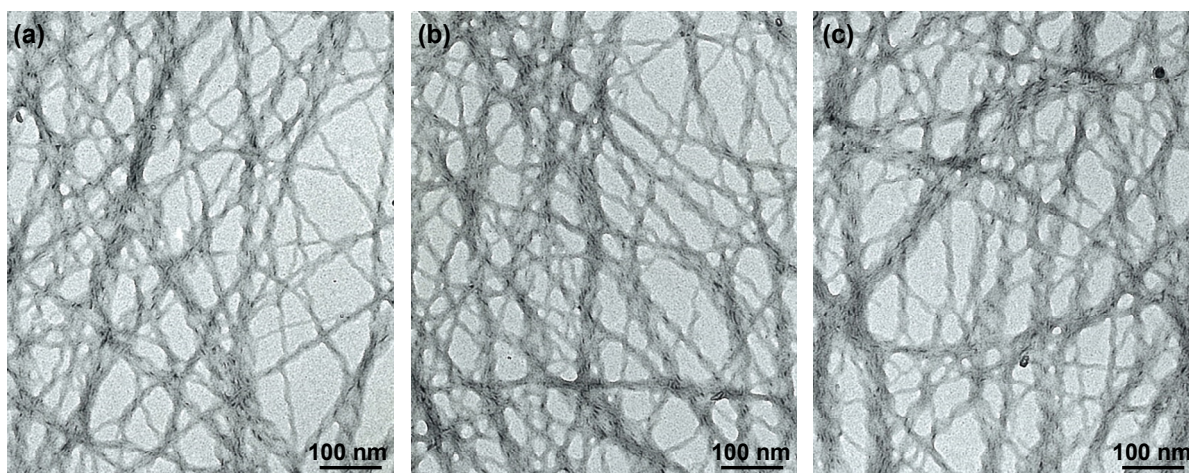

**Fig. S3** (a) TEM image of the helical nanofibers obtained by self-assembly of GlcEG<sub>1</sub> in water. (b) TEM image of the helical nanofibers obtained by self-assembly of GlcEG<sub>3</sub> in water. (c) TEM image of the helical nanofibers obtained by self-assembly of GlcEG<sub>5</sub> in water.

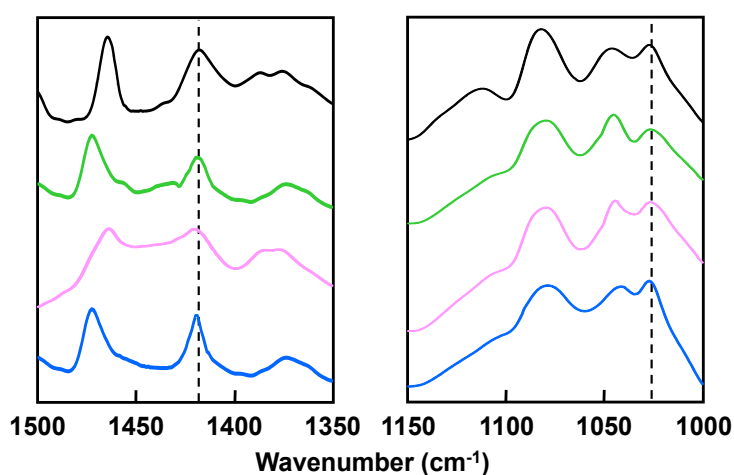

**Fig. S4** The CH deformation ( $1420\text{ cm}^{-1}$ ) and skeletal ( $1026\text{ cm}^{-1}$ ) vibration bands for the triglycine moieties in the 1-nanotube (black line), GlcEG<sub>1</sub>-nanotube (green line), GlcEG<sub>3</sub>-nanotube (pink line), and GlcEG<sub>5</sub>-nanotube (blue line).

Existence of those two bands suggests that TGly and the triglycine moiety of **1** forms polyglycine-II-type hydrogen bond network.\*

\* (a) T. Shimizu, M. Kogiso, M. Masuda, *J. Am. Chem. Soc.*, 1997, **119**, 6209; (b) C. H. Bamford, L. Brown, E. M. Cant, A. Elliott, W. E. Hanby, B. R. Malcolm, *Nature*, 1955, **176**, 396; (c) F. H. C. Crick, A. Rich, *Nature*, 1955, **176**, 780; (d) E.R. Blout, S. G. Linsley, *J. Am. Chem. Soc.*, 1952, **74**, 1946.

**Table S1** IR absorption band of nanotubes

|                                          | 1-nanotube              | GlcEG <sub>1</sub> -nanotube | GlcEG <sub>3</sub> -nanotube | GlcEG <sub>5</sub> -nanotube |
|------------------------------------------|-------------------------|------------------------------|------------------------------|------------------------------|
| Amide I / cm <sup>-1</sup>               | 1642                    | 1642                         | 1644                         | 1645                         |
| Amide II / cm <sup>-1</sup>              | 1561                    | 1561                         | 1560                         | 1560                         |
| $\delta(\text{CH}_2)$ / cm <sup>-1</sup> | 1465 (8.3) <sup>1</sup> | 1465 (8.5) <sup>1</sup>      | 1465 (8.5) <sup>1</sup>      | 1465 (8.3) <sup>1</sup>      |
| $r(\text{CH}_2)$ / cm <sup>-1</sup>      | 719                     | 719                          | 719                          | 719                          |

<sup>1</sup>Full width half-maximum

Single sharp peaks at 1465 and 719 cm<sup>-1</sup> assignable to  $\delta(\text{CH}_2)$  scissoring and  $\gamma(\text{CH}_2)$  rocking vibration bands indicates that the lateral chain packing of the oligomethylene spacer in **1** and GlcEG<sub>*n*</sub> is of a triclinic parallel type.\*\*

\*\* a) N. Kameta, K. Ishikawa, M. Masuda, T. Shimizu, *Langmuir*, 2013, **23**, 13291; (b) N. Kameta, S. J. Lee, M. Masuda, *J. Mater. Chem. B*, 2013, **1**, 276; (c) N. Kameta, M. Masuda, H. Minamikawa, T. Shimizu, *Langmuir*, 2007, **23**, 4634; (d) N. Kameta, G. Mizuno, M. Masuda, H. Minamikawa, M. Kogiso, T. Shimizu, *Chem. Lett.*, 2007, **36**, 896.

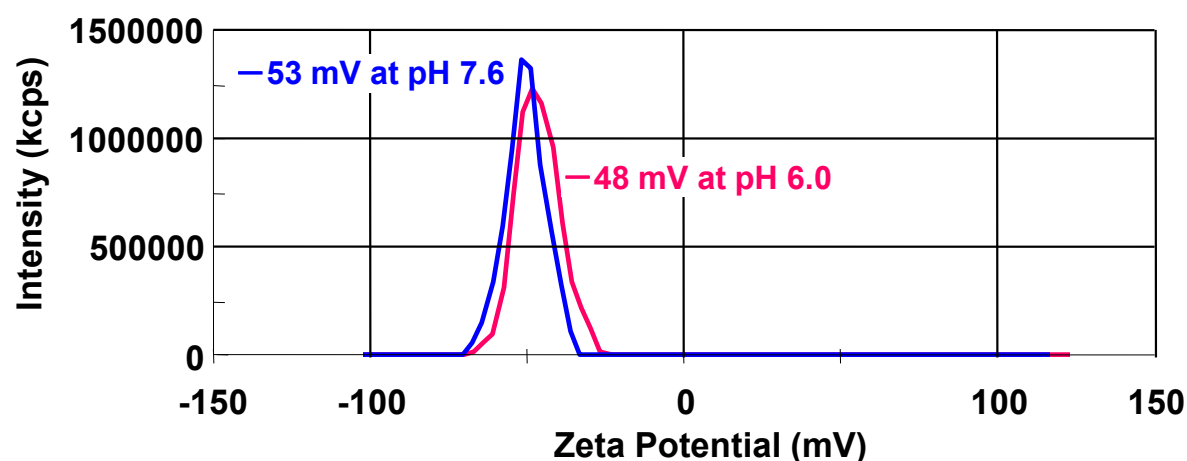

**Fig. S5** The zeta potential distributions of the GlcEG<sub>3</sub>-nanotube in water at pH 6.0 and 7.6. Each value was obtained from dynamic light scattering (DLS) measurements.

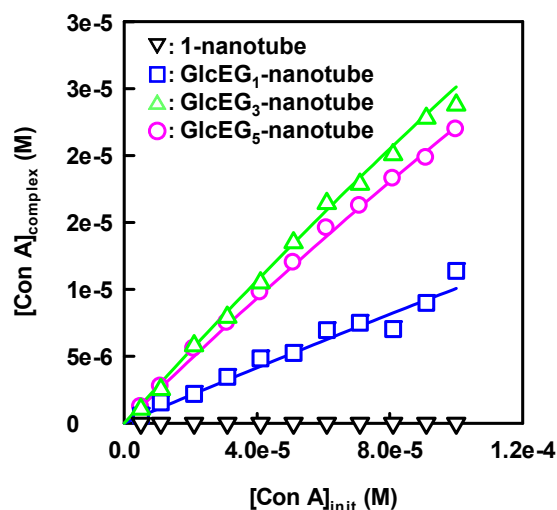

**Fig. S6** Relationship between the initial concentration of Con A and the concentration of Con A complexed with the GlcEG<sub>n</sub>-nanotubes. The latter concentration was estimated as the concentration of the isolated Con A with the GlcEG<sub>n</sub>-nanotubes by filtration procedure, and was determined by UV/VIS spectroscopic measurements. The  $\beta$  values were determined by a nonlinear least squares fitting based on the general equation. Each solid line calculated by using  $\beta$  values is in good agreement with the experimental plots.

$$\beta = \frac{[\text{GlcEG}_n\text{-nanotube-Con A}]}{[\text{GlcEG}_n\text{-nanotube}][\text{Con A}]}$$

[Con A] was considered that Con A has four binding sites for the glucose moiety.

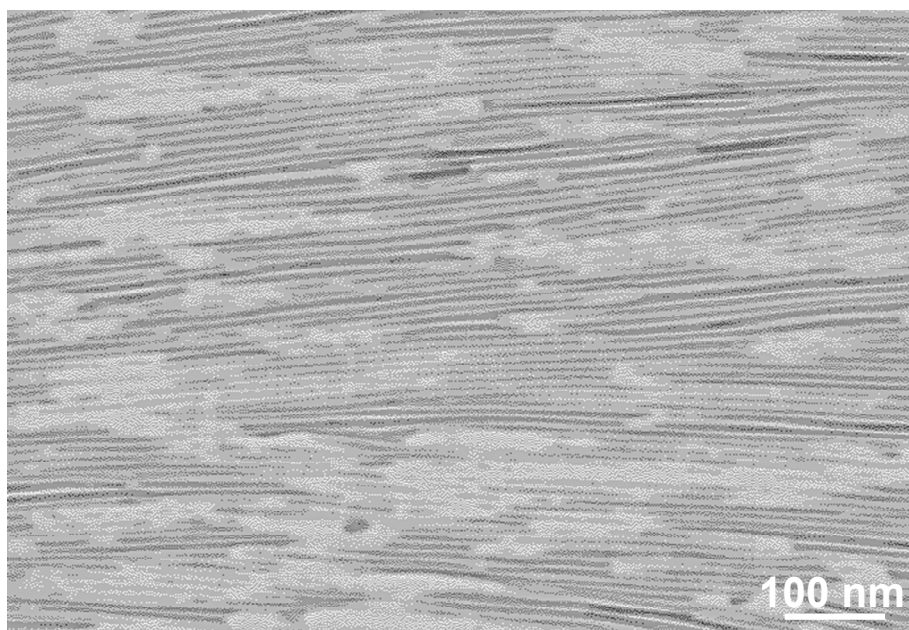

**Fig. S7** TEM image of the liquid crystal in the dry state of GlcEG<sub>3</sub>-nanotubes complexed with Con A. The hollow cylinder of the nanotubes can be visualized as dark contrasts with the negative staining reagent, 2wt% phosphotungstate.



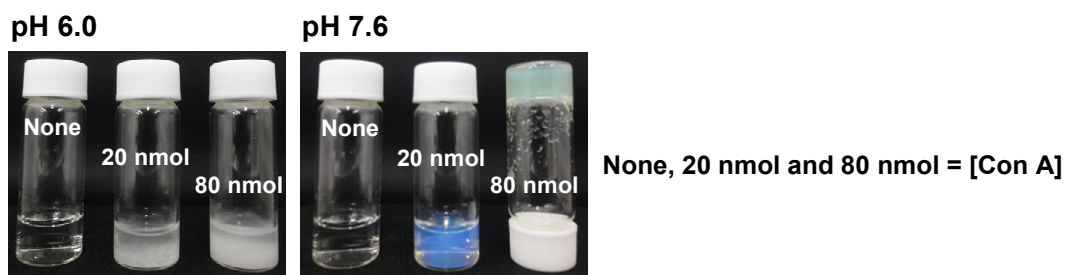

**Fig. S8** Photographs of samples at pH 6.0 and 7.6 of the GlcEG<sub>3</sub>-nanotube (1.1 mg/mL, **1** = 1.8 μmol, TGly = 0.2 μmol, GlcEG<sub>3</sub> = 0.2 μmol) in the presence and absence of Con A.

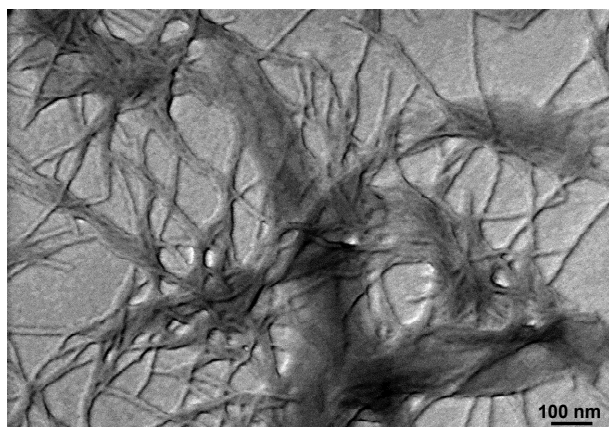

**Fig. S9** SEM image of the GlcEG<sub>5</sub>-nanotube dispersion in the presence of 20 nmol Con A.
